# Supplementary material for: An in vitro fibrotic liver lobule model through sequential cell-seeding of HSCs and HepG2 on 3D-printed poly(glycerol sebacate) acrylate scaffolds
Source: Royal Society of Chemistry journal article supplement (doi:10.1039/d1tb02686k), 2022-01-01
Supplement: d1tb02686k1.pdf [file d1tb02686k1.pdf]

**Electronic Supplementary Information**

**An in vitro fibrotic liver lobule model through sequential cell-seeding of HSC and  
HepG2 on 3D-printed poly(glycerol sebacate) acrylate scaffolds**

Syuan-Ku Hsiao<sup>a</sup>, Cheng-Wei Liang<sup>a</sup>, Tze-Ling Chang<sup>a</sup>, Yun-Chieh Sung<sup>a, b</sup>, Yi-Ting  
Chen<sup>a</sup>, Yunching Chen<sup>b</sup>, Jane Wang<sup>a\*</sup>

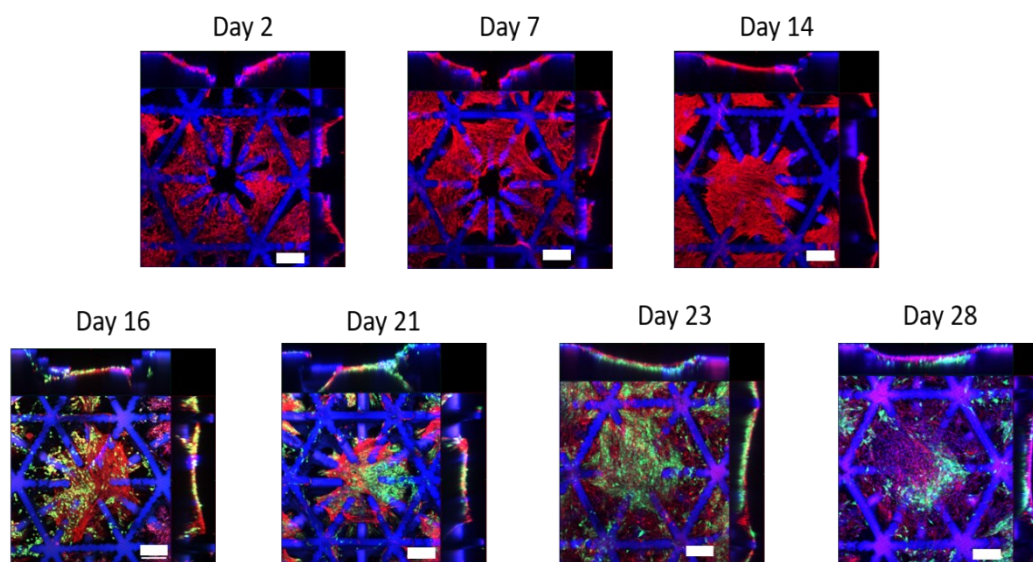

Figure S1 X-Y, Y-Z, X-Z projection of fluorescence images in Figure 8b. Scale bar represents 200  $\mu\text{m}$ .
